# Supplementary material for: Shape-controlled synthesis and facet-dependent performance of single-crystal Bi25GaO39photocatalysts
Source: Royal Society of Chemistry journal article supplement (doi:10.1039/c6ce01466f), 2016-01-01
Supplement: c6ce01466f1.pdf [file c6ce01466f1.pdf]

## Electronic Supplementary Information

### Shape-controlled synthesis and facet-dependent performance of single-crystal $\text{Bi}_{25}\text{GaO}_{39}$ photocatalyst

Jin Liu,<sup>†a</sup> Wei Lu,<sup>†b</sup> Boshi Tian,<sup>a</sup> Bin Hu,<sup>a</sup> Lin Jin,<sup>a</sup> Yurong Shi,<sup>a</sup> Lili Li<sup>a</sup> and

Zhenling Wang<sup>a,\*</sup>

<sup>a</sup>The Key Laboratory of Rare Earth Functional Materials and Applications, Zhoukou

Normal University, Zhoukou 466001, P. R. China

<sup>b</sup>Department of Applied Physics and Materials Research Center, The Hong Kong

Polytechnic University, Hong Kong, P. R. China

\*Corresponding author. Fax: +86-394-8178518; Tel: +86-394-8178518.

E-mail addresses: zlwang2007@hotmail.com (Z.L. Wang)

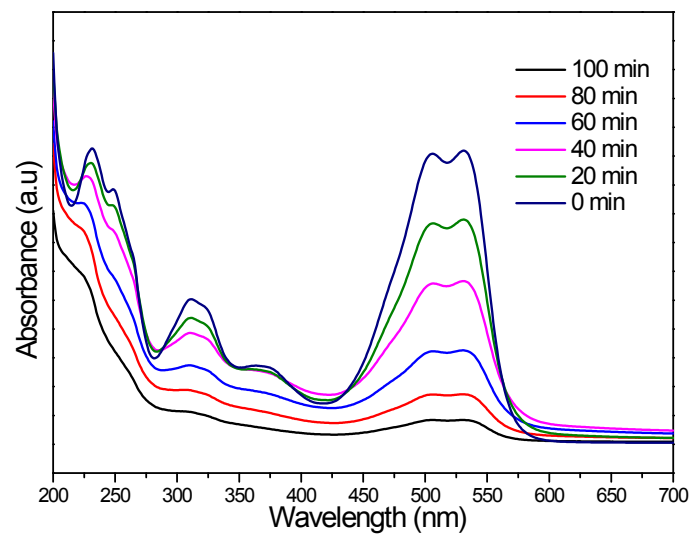

Fig. S1 UV-vis absorption spectra of AR1 solution during the photocatalytic process over  $\text{Bi}_{25}\text{GaO}_{39}$  tetrahedrons.

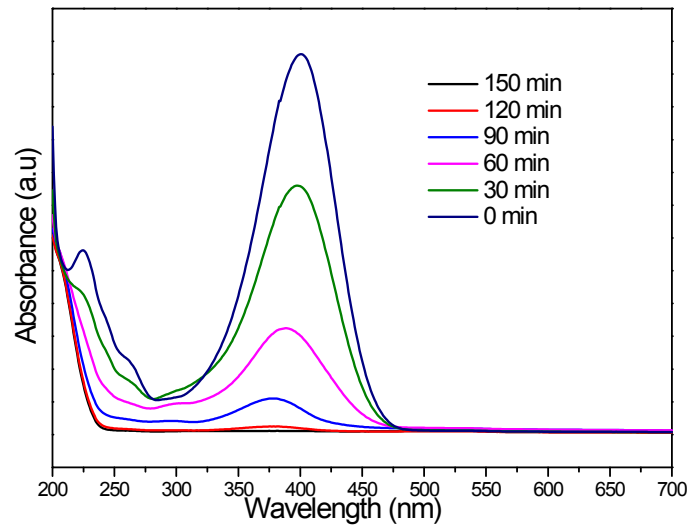

Fig. S2 UV-vis absorption spectra of 4-NP solution during the photocatalytic process over  $\text{Bi}_{25}\text{GaO}_{39}$  tetrahedrons.

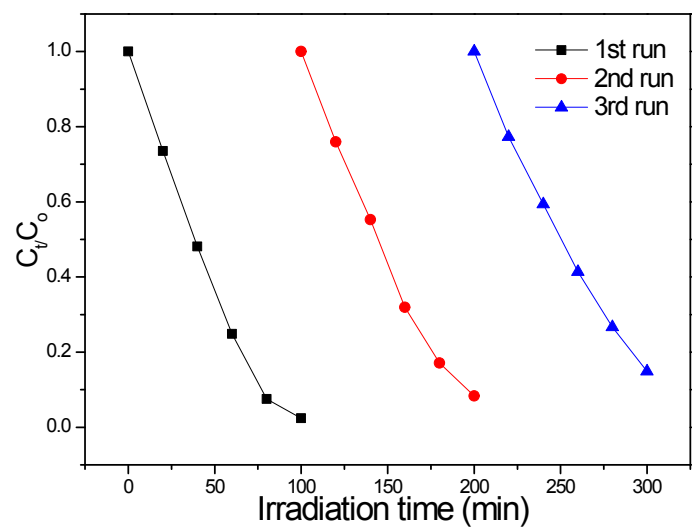

Fig. S3 Recycling runs of  $\text{Bi}_{25}\text{GaO}_{39}$  tetrahedrons for the photocatalytic degradation of AR1 solution.
